# Supplementary material for: Supercapattery driven electrolyzer both empowered by the same superb electrocatalyst
Source: Royal Society of Chemistry journal article supplement (doi:10.1039/d1ta05333g), 2021-01-01
Supplement: d1ta05333g1.pdf [file d1ta05333g1.pdf]

## Supporting Information

### Supercapattery-driven electrolyzer both empowered by the same superb electrocatalyst

*Thangavel Kavinkumar, Selvaraj Seenivasan, Amarnath T. Sivagurunathan and Do-Heyoung Kim\**

School of Chemical Engineering, Chonnam National University, 77 Yongbong-ro, Gwangju 61186, Republic of Korea.

\*Corresponding author's email: [kdh@chonnam.ac.kr](mailto:kdh@chonnam.ac.kr)

Tel. (office): +82-62-530-1894

### Experimental section

**Synthesis of  $\text{CuCo}_2\text{O}_4$  nanoneedles:** Typically,  $\text{CoCl}_2 \cdot 6\text{H}_2\text{O}$  (2 mM),  $\text{CuCl}_2 \cdot 6\text{H}_2\text{O}$  (1 mM), and urea (20 mM) were dissolved in 40 mL of deionized (DI) water under stirring. Cleaned NF was immersed in the as-prepared reaction mixture. The above solution was then transferred into a 100 mL Teflon autoclave and maintained at 120 °C for 10 h. Finally, the resulting  $\text{CuCo}_2\text{O}_4$ -coated NF was annealed at 300 °C under a  $\text{N}_2$  atmosphere. The obtained  $\text{CuCo}_2\text{O}_4$  was rinsed with DI water and ethanol and then dried at 70 °C for further use.

**Synthesis of the Encapsulated  $\text{CuCo}_2\text{O}_4/\text{MoNi}$ :** Typically, 1 mmol  $\text{Ni}(\text{NO}_3)_2 \cdot 6\text{H}_2\text{O}$ , 1 mmol  $\text{Na}_2\text{MoO}_4 \cdot 2\text{H}_2\text{O}$ , and 7.5 mmol urea were mixed in 40 mL of DI water under stirring. Then, a piece of NF coated with the  $\text{CuCo}_2\text{O}_4$  was then immersed in the reaction mixture. Then, it was

transferred to a 100 mL Teflon-lined autoclave and kept at 150°C for 3 h. Then, the product was washed with DI water and ethanol and dried at 60°C. The CuCo<sub>2</sub>O<sub>4</sub>/MoNi were obtained by annealing the above prepared sample in a H<sub>2</sub>/Ar (5:95) atmosphere at 500 °C for 2 h.

***Preparation of NiO encapsulated CuCo<sub>2</sub>O<sub>4</sub>/MoNi:*** Thin NiO layers were deposited over the CuCo<sub>2</sub>O<sub>4</sub>/MoNi architecture on NF via 420 deposition cycles using a laboratory-built flow-type ALD reactor.<sup>1</sup> During deposition, the temperature was maintained at 175 °C.

### ***Characterizations***

XRD data of the samples were recorded by a Rigaku X-ray diffractometer X-ray diffractometer with CuK $\alpha$  radiation. The morphologies and microstructures of the samples were investigated by FE-SEM (JEOL JSM-7500F) and TEM (TECNAI G2 F20 TEM system). XPS was performed on an ESCALAB-MKII, VG Scientific Co. system. The Brunauer-Emmett-Teller (BET, ASAP2010, Micromeritics) was done to measure surface area of the prepared products.

### **Water splitting measurements**

Electrocatalytic properties of the as-prepared samples on the NF were carried out in a three-electrode cell, where SCE and Pt foil were employed as the reference and counter, electrodes using the electrochemical workstation (WonATech WBCS30000), respectively. Additionally, 5 mg of Pt/C (or RuO<sub>2</sub>) and 10  $\mu$ L of Nafion were dispersed in 1 mL of a water/alcohol mixture solution (3:1) using ultrasonication to prepare an ink. Finally, 50  $\mu$ L of the catalyst ink was coated on NF and dried at 60°C. Additionally, LSV measurements were performed at 2 mV s<sup>-1</sup> for the OER and HER in a 1 M KOH. The EIS measurement were conducted using a Parstat 3000 workstation (0.01 Hz to 100 kHz with a 10 mV amplitude). A gas

chromatography (074-594-P1E Micro GC Fusion, INFICON) was used to analyze the amount of the gaseous products. All potentials were calibrated to the RHE using Eq. 1;  $\eta$  was obtained using Eq. 2 and the Tafel slope was obtained using Eq. 3:

$$E_{\text{RHE}} = E_{\text{SCE}} + 0.059\text{pH} + 0.247, \quad (1)$$

$$\eta = E_{\text{RHE}} - 1.23, \quad (2)$$

$$\eta = b \log j + a. \quad (3)$$

### Supercapattery measurements

The electrochemical capacitive properties of the as-prepared heterostructure electrodes were carried out in 2 M KOH aqueous solution using a three-electrode cell. The as-fabricated materials on NF, Pt foil and SCE were employed as the working, counter and reference electrodes, respectively. The mass loading of the NiO@CuCo<sub>2</sub>O<sub>4</sub>/MoNi/MoO<sub>2</sub> heterostructure and AC were measured to be 4.3 and 5.4 mg cm<sup>-2</sup>, respectively. In the supercapattery cell, the NiO@CuCo<sub>2</sub>O<sub>4</sub>/MoNi/MoO<sub>2</sub> heterostructure electrode used as the cathode and AC as the anode with 2M KOH/PVA gel as the electrolyte.

Specific capacitance ( $C_s$ , F g<sup>-1</sup>) and specific capacity ( $C_m$ , C g<sup>-1</sup>) from GCD test was calculated by using the relation,<sup>2,3</sup>

$$C_s = \frac{2i/V dt}{m (V_f - V_i)^2} \quad (4)$$

$$C_m = C_s \times \Delta V \quad (5)$$

where,  $m$  (g),  $i$  (A),  $(V_f - V_i)$ , and  $\int V dt$  are the mass of the active materials coated on NF, applied current, functional potential frame, and the integral area of discharge curve, respectively.

The energy density ( $E$ ) and power density ( $P$ ) of the supercapattery were calculated according to the following formulas:

$$E = \frac{I \int V dt}{3.6} \quad (6)$$

$$P = \frac{3600 \times E}{t} \quad (7)$$

Where  $I$  (A g<sup>-1</sup>) and  $t$  (s) are the current density, and discharge time of the supercapattery cell, respectively.

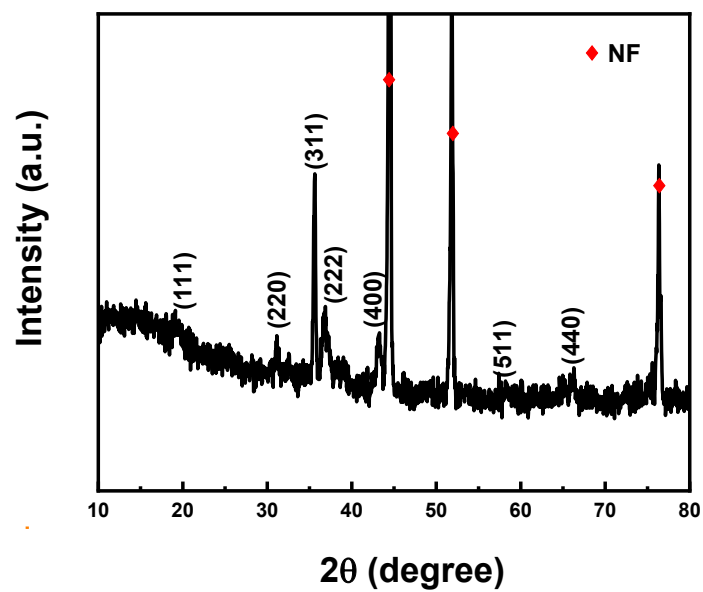

**Figure S1.** XRD pattern of the  $\text{CuCo}_2\text{O}_4$  nano-needle from the NF substrate.

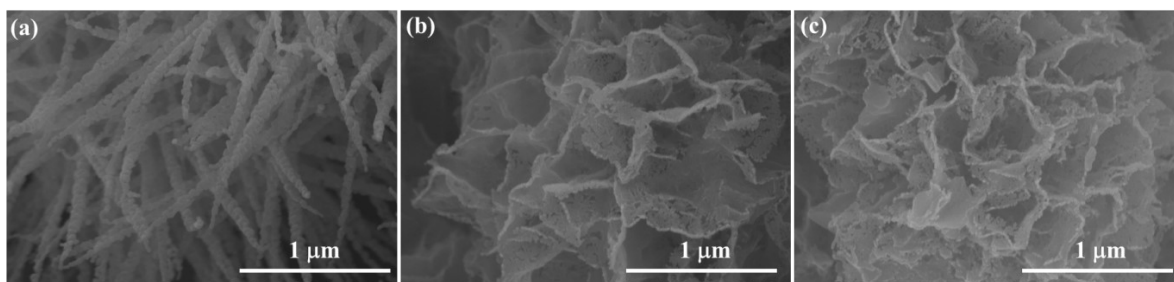

**Figure S2.** FE-SEM images of a)  $\text{CuCo}_2\text{O}_4$ , b) MoNi, and c)  $\text{CuCo}_2\text{O}_4/\text{MoNi}$ .

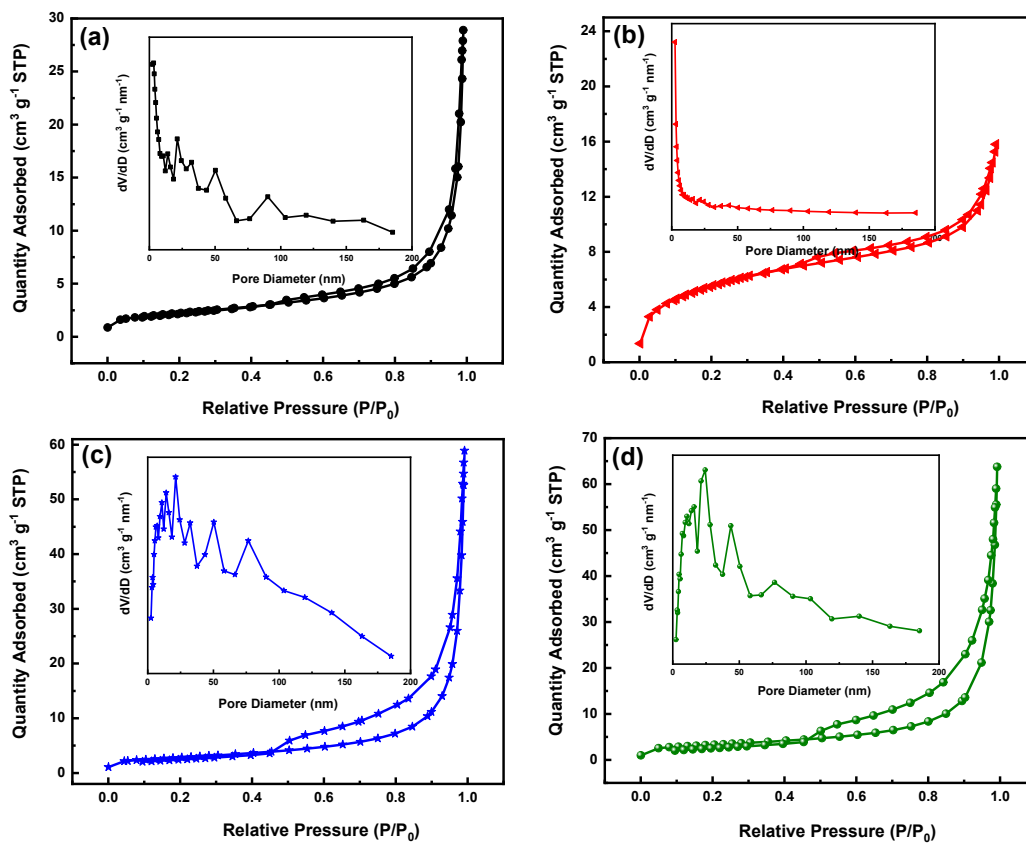

**Figure S3.**  $N_2$  adsorption-desorption isotherms of a)  $\text{CuCo}_2\text{O}_4$ , b)  $\text{MoNi}$ , c)  $\text{CuCo}_2\text{O}_4/\text{MoNi}$  and d)  $\text{NiO}@CuCo_2O_4/\text{MoNi}$  heteronanostructure. Inset shows corresponding pore size distribution profiles.

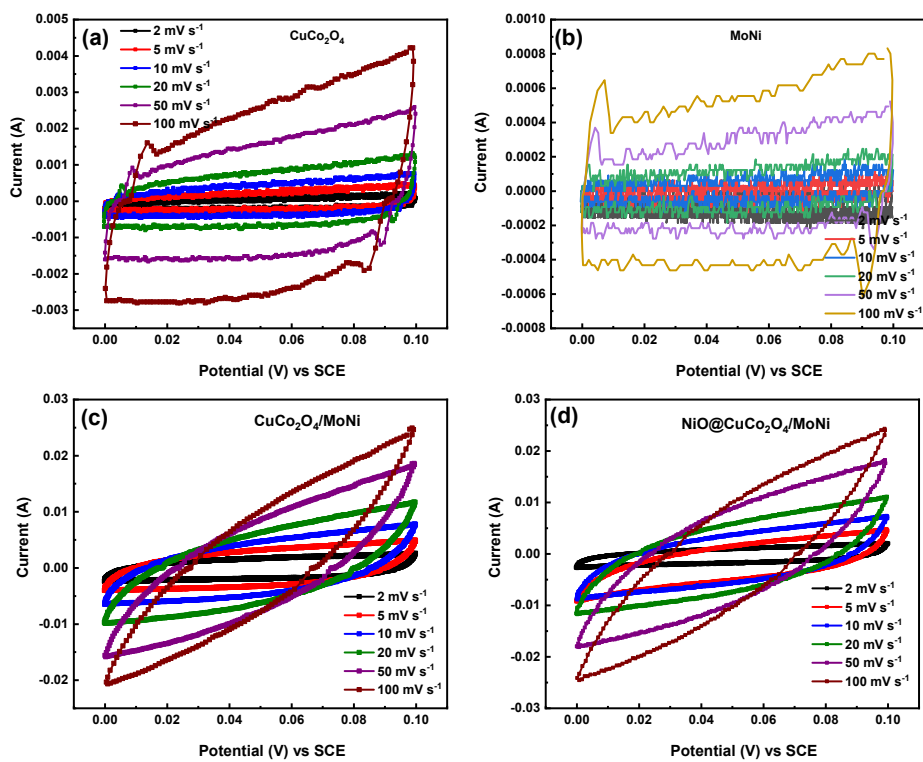

**Figure S4.** CV profiles of a)  $\text{CuCo}_2\text{O}_4$ , b)  $\text{MoNi}$ , c)  $\text{CuCo}_2\text{O}_4/\text{MoNi}$  and d)  $\text{NiO}@\text{CuCo}_2\text{O}_4/\text{MoNi}$  at different sweep rates in 1 M KOH.

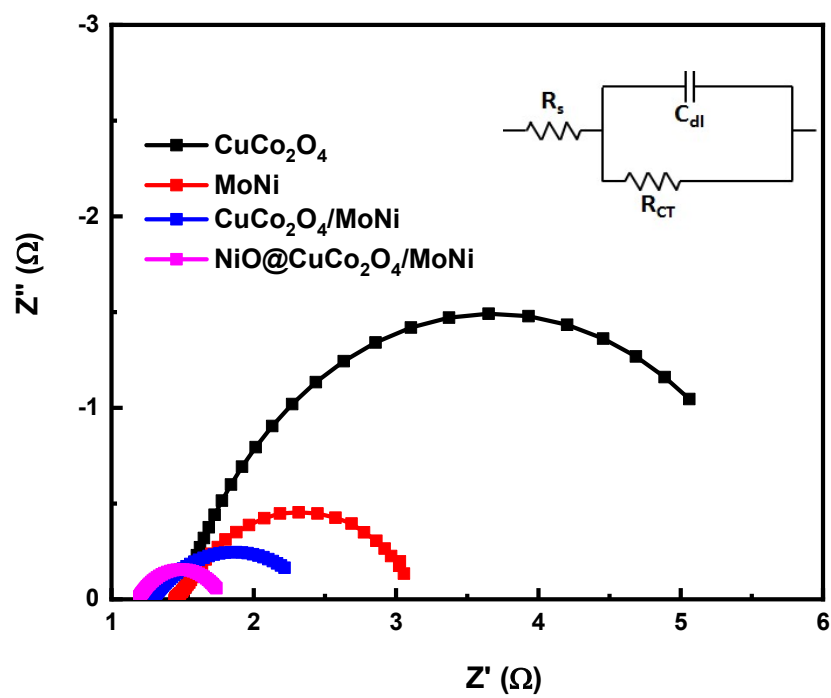

**Figure S5.** Nyquist plots for the as-prepared samples at -0.2 V. The inset shows the electrochemical equivalent circuit.



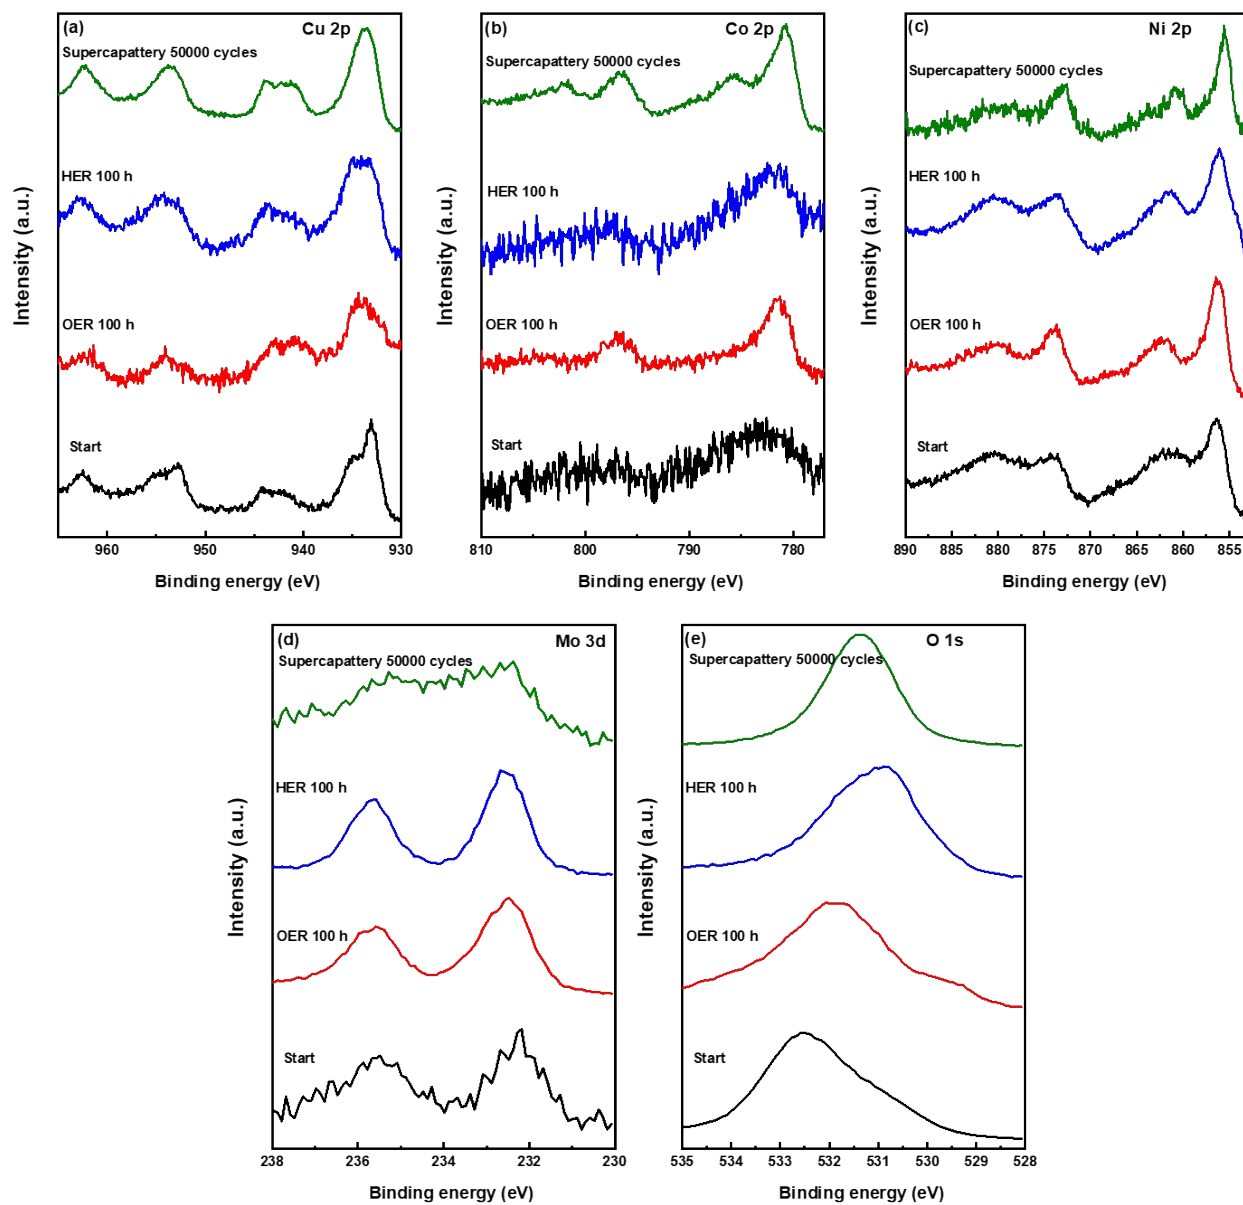

**Figure S6.** XPS spectra of a) Cu 2p, b) Co 2p, c) Ni 2p, d) Mo 3d and e) O 1s for NiO@CuCo<sub>2</sub>O<sub>4</sub>/MoNi heterostructure before and after OER, HER, and supercapattery test.

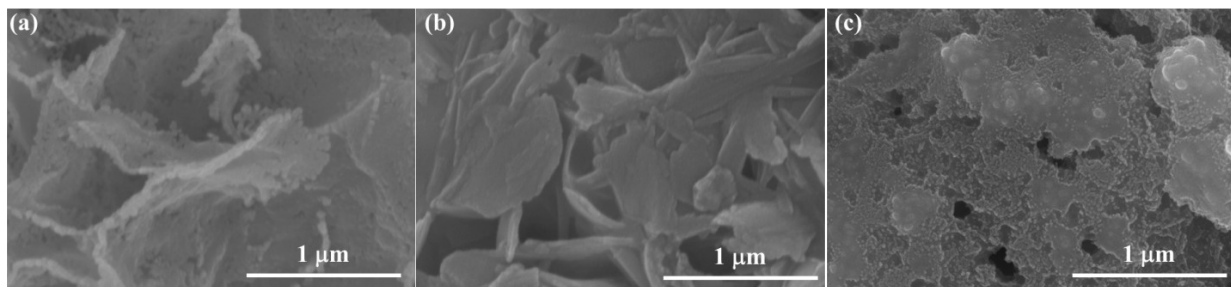

**Figure S7.** FE-SEM images of the NiO@CuCo<sub>2</sub>O<sub>4</sub>/MoNi heterostructure after a) OER, b) HER, and c) supercapattery test.

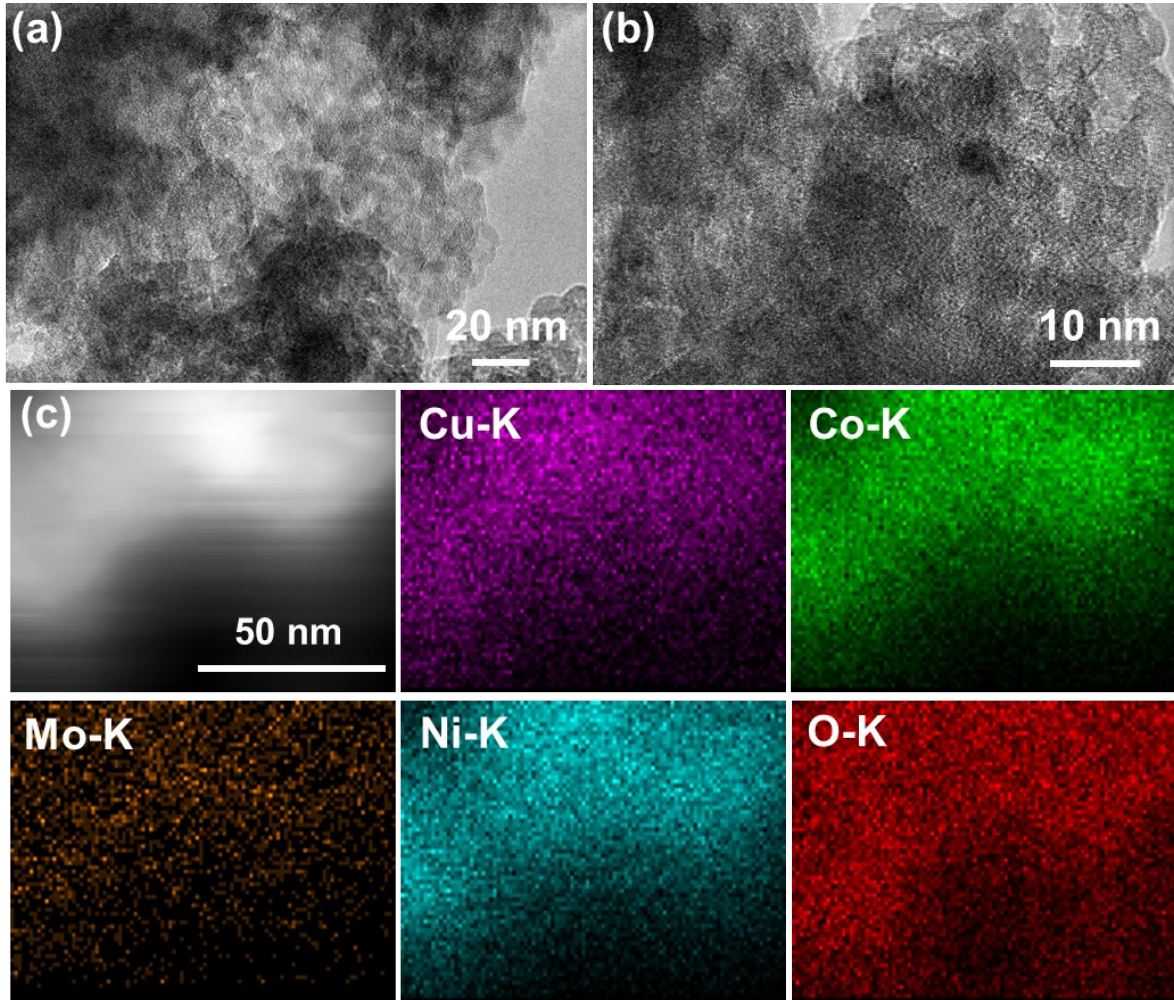

**Figure S8.** HR-TEM images of the NiO@CuCo<sub>2</sub>O<sub>4</sub>/MoNi heterostructure after a, b) HER test and c) the corresponding elemental mapping of NiO@CuCo<sub>2</sub>O<sub>4</sub>/MoNi heterostructure.

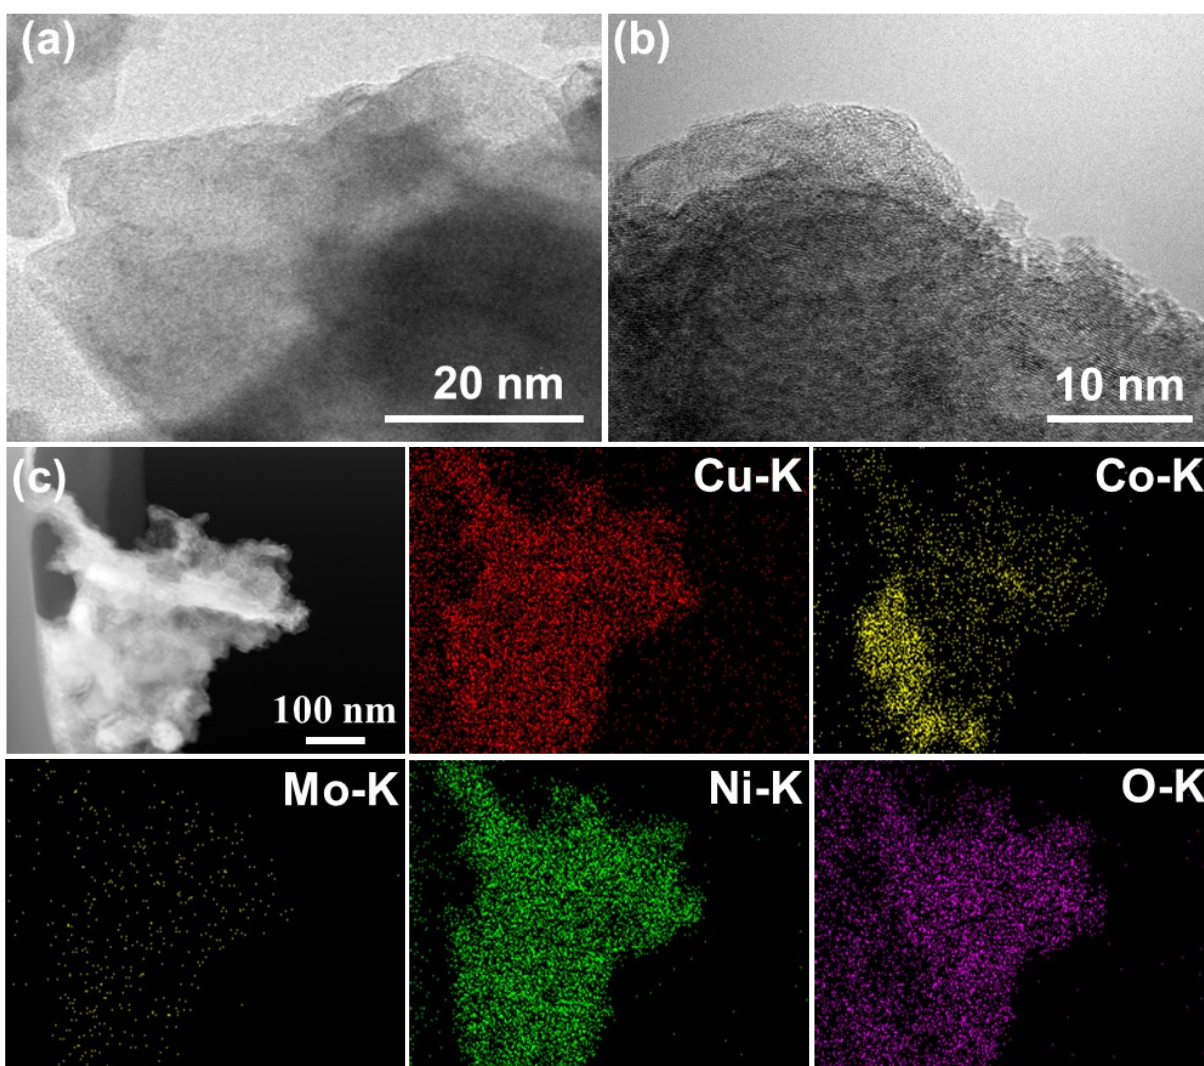

**Figure S9.** HR-TEM images of the NiO@CuCo<sub>2</sub>O<sub>4</sub>/MoNi heterostructure after a, b) OER test and c) the corresponding elemental mapping of NiO@CuCo<sub>2</sub>O<sub>4</sub>/MoNi heterostructure.

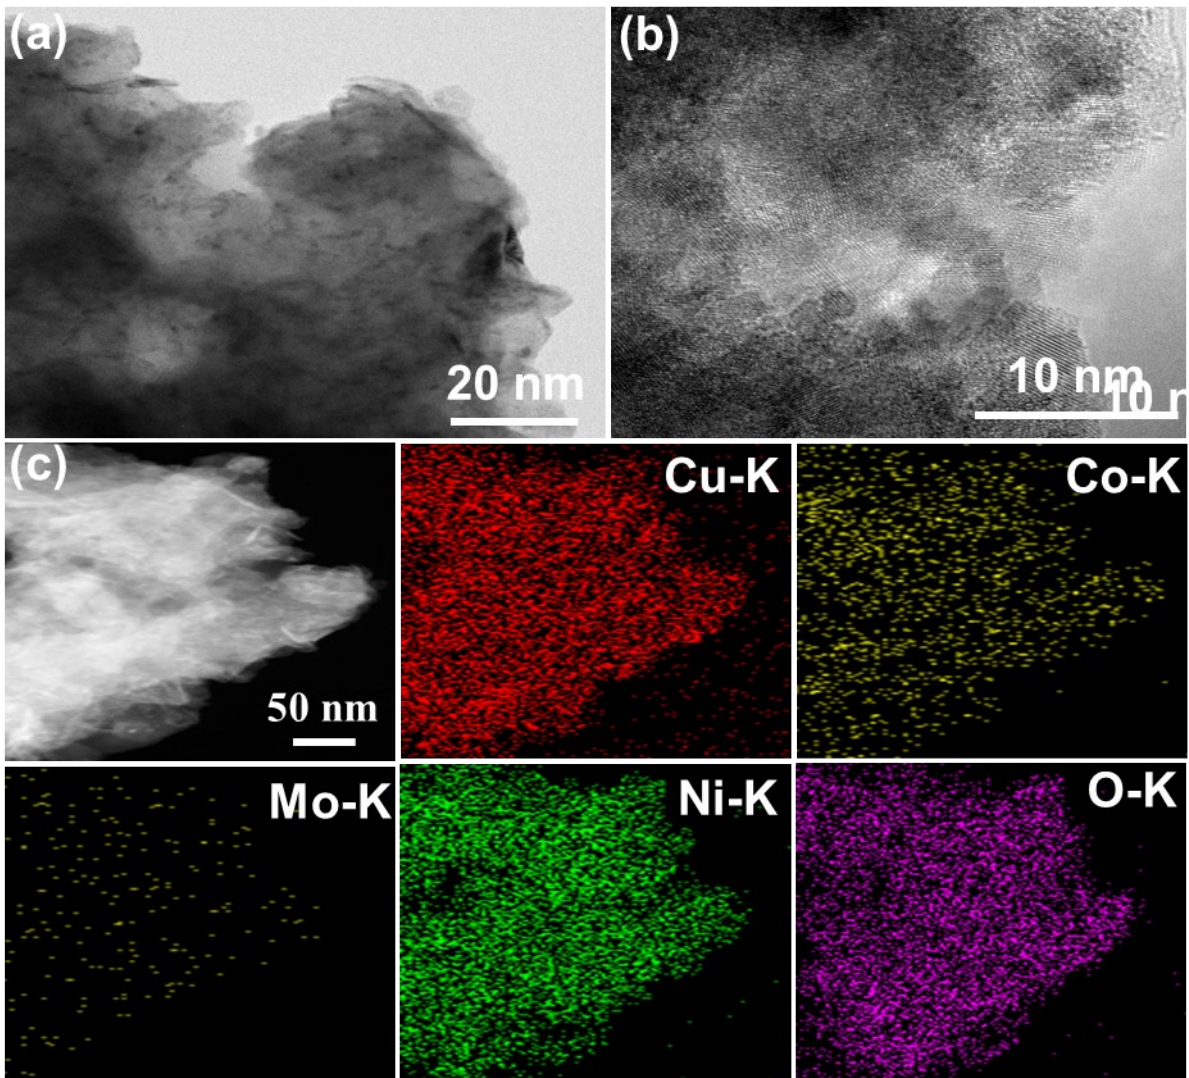

**Figure S10.** HR-TEM images of the NiO@CuCo<sub>2</sub>O<sub>4</sub>/MoNi heterostructure after a, b) 50000 cycling test and c) the corresponding elemental mapping of NiO@CuCo<sub>2</sub>O<sub>4</sub>/MoNi heterostructure.

**Table S1.** Comparison of HER performances of NiO@CuCo<sub>2</sub>O<sub>4</sub>/MoNi heterostructure with other reported electrocatalysts.

| Catalyst                                                    | Electrolyte | Overpotential at 50 mA cm <sup>-2</sup> (mV) | Tafel slope (mV dec <sup>-1</sup> ) | Ref.      |
|-------------------------------------------------------------|-------------|----------------------------------------------|-------------------------------------|-----------|
| NiO@CuCo <sub>2</sub> O <sub>4</sub> /MoNi heterostructure  | 1 M KOH     | 61.0                                         | 44.2                                | This work |
| NiMoO <sub>x</sub> /NiMoS                                   | 1 M KOH     | ~63                                          | -                                   | 4         |
| MoS <sub>2</sub> /Ni <sub>3</sub> S <sub>2</sub>            | 1 M KOH     | ~175                                         | -                                   | 5         |
| NiCo <sub>2</sub> O <sub>4</sub> @NiMoO <sub>4</sub>        | 1 M KOH     | 300                                          | 94.0                                | 6         |
| NiCo <sub>2</sub> O <sub>4</sub> @Ni <sub>0.796</sub> CoLDH | 1 M KOH     | 115                                          | 56.4                                | 7         |
| FeOOH/NiCo <sub>2</sub> O <sub>4</sub>                      | 1 M KOH     | 146                                          | 41.3                                | 8         |
| Ni(OH) <sub>2</sub> @CuS                                    | 1 M KOH     | 95                                           | 42.0                                | 9         |
| H-Fe-CoMoS                                                  | 1 M KOH     | 138                                          | 98.0                                | 10        |
| Co/Co <sub>2</sub> Mo <sub>3</sub> O <sub>8</sub>           | 1 M KOH     | ~110                                         | -                                   | 11        |
| NiFe-LDH/NiCo <sub>2</sub> O <sub>4</sub>                   | 1 M KOH     | 192                                          | 59.0                                | 12        |
| Ni <sub>3</sub> N/Pt                                        | 1 M KOH     | 83                                           | -                                   | 13        |
| Mo-NiCoP                                                    | 1 M KOH     | 121                                          | -                                   | 14        |
| NiCo <sub>2</sub> O <sub>4</sub> @CoMoO <sub>4</sub>        | 1 M KOH     | 121                                          | 77.0                                | 15        |

**Table S2.** Comparison of OER performances of NiO@CuCo<sub>2</sub>O<sub>4</sub>/MoNi heterostructure with other reported electrocatalysts.

| Catalyst                                                         | Electrolyte | Overpotential at 100 mA cm <sup>-2</sup> (mV) | Tafel slope (mV dec <sup>-1</sup> ) | Ref.      |
|------------------------------------------------------------------|-------------|-----------------------------------------------|-------------------------------------|-----------|
| NiO@CuCo <sub>2</sub> O <sub>4</sub> /MoNi heterostructure       | 1 M KOH     | 370                                           | 69.1                                | This work |
| NiCo <sub>2</sub> O <sub>4</sub> @CoMoO <sub>4</sub>             | 1 M KOH     | ~490                                          | -                                   | 15        |
| NiCo <sub>2</sub> O <sub>4</sub> @NiMoO <sub>4</sub>             | 1 M KOH     | ~420                                          | -                                   | 16        |
| Fe <sub>2</sub> O <sub>3</sub> @CuO NTs                          | 1 M KOH     | ~380                                          | -                                   | 17        |
| Ni@Co-Ni-P                                                       | 1 M KOH     | 380                                           | 65                                  | 18        |
| Co <sub>3</sub> O <sub>4</sub> /NiCo <sub>2</sub> O <sub>4</sub> | 1 M KOH     | 495                                           | 88                                  | 19        |
| NiCoFe phosphate NSs-C                                           | 1 M KOH     | ~350                                          | -                                   | 20        |
| Ni <sub>2</sub> P@NF-6                                           | 1 M KOH     | 590                                           | 297                                 | 21        |
| p-Cu <sub>1-x</sub> NNi <sub>3-y</sub> /FeNiCu                   | 1 M KOH     | ~350                                          | -                                   | 22        |
| NiCoP NWAs/NF                                                    | 1 M KOH     | ~320                                          | -                                   | 23        |

**Table S3.** Comparison of water splitting performance of NiO@CuCo<sub>2</sub>O<sub>4</sub>/MoNi heterostructure with other reported bi-functional electrocatalysts based on transition metals.

| Catalyst                                                   | Electrolyte | Voltage (V)                     | Ref.      |
|------------------------------------------------------------|-------------|---------------------------------|-----------|
| NiO@CuCo <sub>2</sub> O <sub>4</sub> /MoNi heterostructure | 1 M KOH     | 1.54 V @ 10 mA cm <sup>-2</sup> | This work |
| E-Mo-NiCoP                                                 | 1 M KOH     | 1.61 V @ 10 mA cm <sup>-2</sup> | 14        |
| FeCo <sub>2</sub> S <sub>4</sub>                           | 1 M KOH     | 1.56 V @ 10 mA cm <sup>-2</sup> | 24        |
| NiSe/Ni <sub>3</sub> Se <sub>2</sub>                       | 1 M KOH     | 1.6 V @ 10 mA cm <sup>-2</sup>  | 25        |
| NiS-Ni <sub>2</sub> P <sub>2</sub> S <sub>6</sub>          | 1 M KOH     | 1.64 V @ 10 mA cm <sup>-2</sup> | 26        |
| NiFe/NiCo <sub>2</sub> O <sub>4</sub>                      | 1 M KOH     | 1.67 V @ 10 mA cm <sup>-2</sup> | 27        |
| NiCo <sub>2</sub> O <sub>4</sub> /NiCoP                    | 1 M KOH     | 1.66 V @ 10 mA cm <sup>-2</sup> | 28        |
| Ni <sub>3</sub> S <sub>2</sub>                             | 1 M KOH     | 1.57 V @ 10 mA cm <sup>-2</sup> | 29        |
| Ni/NiO                                                     | 1 M KOH     | 1.71 V @ 10 mA cm <sup>-2</sup> | 30        |
| Co <sub>x</sub> PO <sub>4</sub> /CoP                       | 1 M KOH     | 1.91 V @ 10 mA cm <sup>-2</sup> | 31        |
| Co <sub>9</sub> S <sub>8</sub> -CoSe <sub>2</sub>          | 1 M KOH     | 1.66 V @ 10 mA cm <sup>-2</sup> | 32        |
| MoP@Ni <sub>3</sub> P/NF                                   | 1 M KOH     | 1.67 V @ 10 mA cm <sup>-2</sup> | 33        |



**Table S4.** Summary of electrochemical performance of transition metal oxide heteronanostructure reported in literature.

| <b>Material</b>                                                    | <b>Fabrication method</b>             | <b>Current Collector</b> | <b>Electrolyte</b> | <b>C, F g<sup>-1</sup><br/>(Current density A g<sup>-1</sup>)</b>                 | <b>Stability<br/>(Cycles)</b> | <b>Ref.</b>   |
|--------------------------------------------------------------------|---------------------------------------|--------------------------|--------------------|-----------------------------------------------------------------------------------|-------------------------------|---------------|
| NiO@CuCo <sub>2</sub> O <sub>4</sub> /MoNi heterostructure         | Hydrothermal/<br>ALD                  | NF                       | 2 M KOH            | 3527.7 F g <sup>-1</sup><br>(1587.5 C g <sup>-1</sup> )<br>(1 A g <sup>-1</sup> ) | 84.2%<br>(50000)              | This work     |
| Cu <sub>2</sub> O@Mn(OH) <sub>2</sub>                              | Solvent process                       | NF                       | 2 M KOH            | 647.2 F g <sup>-1</sup><br>(0.5 A g <sup>-1</sup> )                               | 71.5%<br>(3000)               | <sup>34</sup> |
| CuCo <sub>2</sub> O <sub>4</sub> /MnCo <sub>2</sub> O <sub>4</sub> | Hydrothermal                          | NF                       | 2 M KOH            | 1434 F g <sup>-1</sup><br>(0.5 A g <sup>-1</sup> )                                | 98.4%<br>(5000)               | <sup>35</sup> |
| CuCo <sub>2</sub> O <sub>4</sub> @Ni(OH) <sub>2</sub>              | Hydrothermal and<br>Electrodeposition | NF                       | 6 M KOH            | 1902.0 F g <sup>-1</sup><br>(2 A g <sup>-1</sup> )                                | 87.6%<br>(50000)              | <sup>36</sup> |
| CuCo <sub>2</sub> O <sub>4</sub> /NiMoO <sub>4</sub>               | Hydrothermal                          | NF                       | 3 M KOH            | 2215.0 F g <sup>-1</sup><br>(1 A g <sup>-1</sup> )                                | 98%<br>(8000)                 | <sup>37</sup> |

|                                                                      |                                      |                    |          |                                                       |                  |    |
|----------------------------------------------------------------------|--------------------------------------|--------------------|----------|-------------------------------------------------------|------------------|----|
| CoMoS@Co(OH) <sub>2</sub>                                            | Hydrothermal and calcination         | Carbon cloth       | 3M KOH   | 1711.0 F g <sup>-1</sup><br>(20 mA cm <sup>-2</sup> ) | 90.3%<br>(5000)  | 38 |
| CuCo <sub>2</sub> O <sub>4</sub> @Co(OH) <sub>2</sub>                | Hydrothermal                         | NF                 | 1 M KOH  | 375.0 F g <sup>-1</sup><br>(1 A g <sup>-1</sup> )     | 85.8%<br>(10000) | 39 |
| CuCo <sub>2</sub> O <sub>4</sub> /CuO nanowire                       | Hydrothermal                         | NF                 | 2 M KOH  | 642.0 F g <sup>-1</sup><br>(1 A g <sup>-1</sup> )     | 88%<br>(5000)    | 40 |
| NiO/NiCo <sub>2</sub> O <sub>4</sub> /Co <sub>3</sub> O <sub>4</sub> | sol-gel process and calcination      | NF                 | 2M KOH   | 1600.0 F g <sup>-1</sup><br>(2.5 A g <sup>-1</sup> )  | 94.9%<br>(1000)  | 41 |
| Co <sub>3</sub> O <sub>4</sub> @CoNi-LDH                             | Hydrothermal                         | NF                 | 2M KOH   | 2676.9 F g <sup>-1</sup><br>(0.5 A g <sup>-1</sup> )  | 67.7%<br>(10000) | 42 |
| CuCo <sub>2</sub> O <sub>4</sub> @Ni(OH) <sub>2</sub>                | Hydrothermal and Chemical deposition | Carbon fiber cloth | 2 M KOH  | 2160.0 F g <sup>-1</sup><br>(5 A g <sup>-1</sup> )    | 92%<br>(5000)    | 43 |
| CuCo <sub>2</sub> O <sub>4</sub> NWs@NiMoO <sub>4</sub>              | Hydrothermal                         | NF                 | 6 M KOH  | 2207.0 F g <sup>-1</sup><br>(1.25 A g <sup>-1</sup> ) | 95.6%<br>(5000)  | 44 |
| CuCo <sub>2</sub> O <sub>4</sub> /NiO nanotrees                      | Hydrothermal and                     | NF                 | 1 M NaOH | 2219.0 F g <sup>-1</sup>                              | 95.3%            | 45 |

|  |                             |  |  |                        |         |  |
|--|-----------------------------|--|--|------------------------|---------|--|
|  | Chemical bath<br>deposition |  |  | (1 A g <sup>-1</sup> ) | (10000) |  |
|--|-----------------------------|--|--|------------------------|---------|--|

**Table S5.** Comparison of energy storage performance of various Cu and Co-based HSCs.

| HSC devices                                                                   | Cell voltage (V) | Electrolyte | C <sub>s</sub> /F g <sup>-1</sup><br>(Current density A g <sup>-1</sup> )       | Stability (Cycles) | Energy density (W h kg <sup>-1</sup> ) | Power density (W kg <sup>-1</sup> ) | Ref.          |
|-------------------------------------------------------------------------------|------------------|-------------|---------------------------------------------------------------------------------|--------------------|----------------------------------------|-------------------------------------|---------------|
| NiO@CuCo <sub>2</sub> O <sub>4</sub> /MoNi heterostructure//AC                | 1.6              | KOH         | 226.7 F g <sup>-1</sup><br>(362.8 C g <sup>-1</sup> )<br>(1 A g <sup>-1</sup> ) | 90.4%<br>(25000)   | 80.6                                   | 692.8                               | This work     |
| CuCo <sub>2</sub> O <sub>4</sub> /CuO//RGO/Fe <sub>2</sub> O <sub>3</sub>     | 1.6              | KOH         | 93.0 F g <sup>-1</sup><br>(0.25 A g <sup>-1</sup> )                             | 83.0%<br>(5000)    | 33.0                                   | 200.0                               | <sup>40</sup> |
| Co <sub>3</sub> O <sub>4</sub> @CoNi-LDH//AC                                  | 1.5              | KOH         | 195.9 F g <sup>-1</sup><br>(1 A g <sup>-1</sup> )                               | 103.5%<br>(5000)   | 61.2                                   | 750                                 | <sup>42</sup> |
| CuCo <sub>2</sub> O <sub>4</sub> /MnCo <sub>2</sub> O <sub>4</sub> //graphene | 1.6              | KOH         | 118.4 F g <sup>-1</sup><br>(0.5 A g <sup>-1</sup> )                             | 88.4%<br>(10000)   | 42.1                                   | 400.0                               | <sup>35</sup> |
| CuCo <sub>2</sub> O <sub>4</sub> /NiMoO <sub>4</sub> //AC                     | 1.5              | KOH         | ~140.0 F g <sup>-1</sup><br>(1 A g <sup>-1</sup> )                              | 89%<br>(5000)      | 44.8                                   | 374.2                               | <sup>37</sup> |
| CuCo <sub>2</sub> O <sub>4</sub> @NiMoO <sub>4</sub> //AC                     | 1.6              | KOH         | 128.2 F g <sup>-1</sup>                                                         | 80.2 %             | 40.0                                   | -                                   | <sup>44</sup> |

|                                                                               |     |      |                                                     |                  |      |        |    |
|-------------------------------------------------------------------------------|-----|------|-----------------------------------------------------|------------------|------|--------|----|
|                                                                               |     |      | (1 A g <sup>-1</sup> )                              | (5000)           |      |        |    |
| CNTs@NCDHNS//rGO-Fe <sub>2</sub> O <sub>3</sub>                               | 1.6 | KOH  | 108.7 F g <sup>-1</sup><br>(1 A g <sup>-1</sup> )   | ~93.5%<br>(1000) | 54.6 | 1130.0 | 46 |
| NiCo-LDH/NiMoS <sub>x</sub> // Fe <sub>2</sub> O <sub>3</sub> /rGO            | 1.6 | KOH  | 203.9 F g <sup>-1</sup><br>(3 mA cm <sup>-2</sup> ) | 91.5%<br>(10000) | 72.6 | 522.7  | 47 |
| CuCo <sub>2</sub> O <sub>4</sub> /NiO//AC                                     | 1.6 | NaOH | 155.0 F g <sup>-1</sup><br>(1 A g <sup>-1</sup> )   | 91.5%<br>(5000)  | 51.8 | 866.0  | 45 |
| CuCo <sub>2</sub> O <sub>4</sub> @MnMoO <sub>4</sub> //graphene               | 1.6 | KOH  | 165.7 F g <sup>-1</sup><br>(1 A g <sup>-1</sup> )   | 92.5%<br>(6000)  | 58.9 | 670.0  | 48 |
| CuCo <sub>2</sub> O <sub>4</sub> @PPy//Carbon                                 | 1.4 | KOH  | 208.0 F g <sup>-1</sup><br>(2 A g <sup>-1</sup> )   | 92 %<br>(5000)   | 52.0 | 748.0  | 49 |
| CuCo <sub>2</sub> O <sub>4</sub> @Ni(OH) <sub>2</sub> //AC                    | 1.6 | KOH  | 108.5 F g <sup>-1</sup><br>(1 A g <sup>-1</sup> )   | 93.7%<br>(5000)  | 38.6 | 800.0  | 36 |
| CuCo <sub>2</sub> S <sub>4</sub> /CuCo <sub>2</sub> O <sub>4</sub> //graphene | 1.6 | KOH  | 90.4 F g <sup>-1</sup><br>(1 A g <sup>-1</sup> )    | 73.0%<br>(5000)  | 33.2 | 800.0  | 50 |

## References

1. T. Kavinkumar, S. Seenivasan, H. H. Lee, H. Jung, J. W. Han and D.-H. Kim, *Nano Energy*, 2021, **81**, 105667.
2. Y. Z. Chen, T. F. Zhou, L. Li, W. K. Pang, X. M. He, Y. N. Liu and Z. P. Guo, *ACS Nano*, 2019, **13**, 9376-9385.
3. S. L. Zhang and N. Pan, *Adv. Energy Mater.*, 2015, **5**, 1401401.
4. P. L. Zhai, Y. X. Zhang, Y. Z. Wu, J. F. Gao, B. Zhang, S. Y. Cao, Y. T. Zhang, Z. W. Li, L. C. Sun and J. G. Hou, *Nat. Commun.*, 2020, **11**, 5462.
5. J. Zhang, T. Wang, D. Pohl, B. Rellinghaus, R. H. Dong, S. H. Liu, X. D. Zhuang and X. L. Feng, *Angew. Chem. Int. Ed.*, 2016, **55**, 6702-6707.
6. D. Cui, R. D. Zhao, J. Q. Dai, J. Xiang and F. F. Wu, *Dalton T.*, 2020, **49**, 9668-9679.
7. M. Li, L. Tao, X. Xiao, X. Jiang, M. Wang and Y. Shen, *ACS Sustain. Chem. Eng.*, 2019, **7**, 4784-4791.
8. X. Cao, Y. Sang, L. Wang, G. Ding, R. Yu and B. Geng, *Nanoscale*, 2020, **12**, 19404-19412.
9. S. Q. Liu, H. R. Wen, Ying-Guo, Y. W. Zhu, X. Z. Fu, R. Sun and C. P. Wong, *Nano Energy*, 2018, **44**, 7-14.
10. Y. N. Guo, X. Zhou, J. Tang, S. Tanaka, Y. V. Kaneti, J. Na, B. Jiang, Y. Yamauchi, Y. S. Bando and Y. Sugahara, *Nano Energy*, 2020, **75**.
11. M. J. Zang, N. Xu, G. X. Cao, Z. J. Chen, J. Cui, L. Y. Gan, H. B. Dai, X. F. Yang and P. Wang, *ACS Catal.*, 2018, **8**, 5062.
12. Z. Q. Wang, S. Zeng, W. H. Liu, X. W. Wang, Q. W. Li, Z. G. Zhao and F. X. Geng, *ACS Appl. Mater. Interfaces*, 2017, **9**, 1488-1495.

13. Y. H. Wang, L. Chen, X. M. Yu, Y. G. Wang and G. F. Zheng, *Adv. Energy Mater.*, 2017, **7**, 1601390.
14. J. H. Lin, Y. T. Yan, C. Li, X. Q. Si, H. H. Wang, J. L. Qi, J. Cao, Z. X. Zhong, W. D. Fei and J. C. Feng, *Nano-Micro Lett.*, 2019, **11**, 3676.
15. Y. Q. Gong, Z. Yang, Y. Lin, J. L. Wang, H. L. Pan and Z. F. Xu, *J. Mater. Chem. A*, 2018, **6**, 16950-16958.
16. X. Q. Du, J. P. Fu and X. S. Zhang, *Chemcatchem.*, 2018, **10**, 5533-5540.
17. Y. Gao, N. Zhang, C. R. Wang, F. Zhao and Y. Yu, *ACS Appl. Energ. Mater.*, 2020, **3**, 666-674.
18. W. Li, X. F. Gao, X. G. Wang, D. H. Xiong, P. P. Huang, W. G. Song, X. Q. Bao and L. F. Liu, *J. Power Sources*, 2016, **330**, 156-166.
19. H. Hu, B. Y. Guan, B. Y. Xia and X. W. Lou, *J. Am. Chem. Soc.*, 2015, **137**, 5590-5595.
20. M. A. Z. G. Sial, H. F. Lin and X. Wang, *Nanoscale*, 2018, **10**, 12975-12980.
21. J. L. Zheng, W. Zhou, T. Liu, S. J. Liu, C. B. Wang and L. Guo, *Nanoscale*, 2017, **9**, 4409-4418.
22. Y. P. Zhu, G. Chen, Y. J. Zhong, Y. B. Chen, N. N. Ma, W. Zhou and Z. P. Shao, *Nat. Commun.*, 2018, **9**, 2326.
23. J. Z. Li, G. D. Wei, Y. K. Zhu, Y. L. Xi, X. X. Pan, Y. Ji, I. V. Zatonovsky and W. Han, *J. Mater. Chem. A*, 2017, **5**, 14828-14837.
24. J. R. Hu, Y. Q. Ou, Y. H. Li, D. Gao, Y. H. Zhang and P. Xiao, *ACS Sustain. Chem. Eng.*, 2018, **6**, 11724-11733.

25. F. F. Zhang, Y. Pei, Y. C. Ge, H. Chu, S. Craig, P. Dong, J. Cao, P. M. Ajayan, M. X. Ye and J. F. Shen, *Adv. Mater. Interfaces*, 2018, **5**, 1701507.
26. X. Y. Zhang, S. Zhang, J. Li and E. K. Wang, *J. Mater. Chem. A*, 2017, **5**, 22131-22136.
27. C. L. Xiao, Y. B. Li, X. Y. Lu and C. Zhao, *Adv. Funct. Mater.*, 2016, **26**, 3515-3523.
28. W. Jin, J. P. Chen, H. B. Wu, N. Zang, Q. W. Li, W. Q. Cai and Z. X. Wu, *Catal. Sci. Technol.*, 2020, **10**, 5559-5565.
29. J. F. Zhang, Y. Li, T. Y. Zhu, Y. Wang, J. W. Cui, J. J. Wu, H. Xu, X. Shu, Y. Q. Qin, H. M. Zheng, P. M. Ajayan, Y. Zhang and Y. C. Wu, *ACS Appl. Mater. Interfaces* 2018, **10**, 31330-31339.
30. H. Sun, Z. Ma, Y. Qiu, H. Liu and G.-g. Gao, *Small*, 2018, **14**, 1800294.
31. Y. Yang, H. L. Fei, G. D. Ruan and J. M. Tour, *Adv. Mater.*, 2015, **27**, 3175-3180.
32. S. Chakrabartty, S. Karmakar and C. R. Raj, *ACS Appl. Nano Mater.*, 2020, **3**, 11326-11334.
33. F. M. Wang, J. W. Chen, X. P. Qi, H. Yang, H. H. Jiang, Y. Q. Deng and T. X. Liang, *Appl. Surf. Sci.* 2019, **481**, 1403-1411.
34. H. Guan, P. Cai, X. Zhang, Y. Zhang, G. Chen and C. Dong, *J. Mater. Chem. A*, 2018, **6**, 13668-13675.
35. S. Liu, K. S. Hui, K. N. Hui, J. M. Yun and K. H. Kim, *J. Mater. Chem. A*, 2016, **4**, 8061-8071.
36. W. Liu, H. Chen, H. Liao, K. Xiang, W. Chen and X. Li, *Ind. Eng. Chem. Res.*, 2019, **58**, 21233-21241.
37. G. F. Li, B. Song, X. Cui, H. Z. Ouyang, K. L. Wang, Y. M. Sun and Y. Q. Wang, *ACS Sustain. Chem. Eng.*, 2020, **8**, 1687-1694.



38. S. J. Patil and D.-W. Lee, *J. Mater. Chem. A*, 2018, **6**, 9592-9603.
39. Y. Zhang, H. Liu, M. Huang, J. M. Zhang, W. Zhang, F. Dong and Y. X. Zhang, *Chemelectrochem.*, 2017, **4**, 721-727.
40. Y. Wang, C. Shen, L. Niu, R. Li, H. Guo, Y. Shi, C. Li, X. Liu and Y. Gong, *J. Mater. Chem. A*, 2016, **4**, 9977-9985.
41. M. C. Liu, L. B. Kong, C. Lu, X. M. Li, Y. C. Luo and L. Kang, *ACS Appl. Mater. Interfaces*, 2012, **4**, 4631-4636.
42. J.-J. Zhou, Q. Li, C. Chen, Y.-L. Li, K. Tao and L. Han, *Chem. Eng. J.*, 2018, **350**, 551-558.
43. D. Zhu, X. Sun, J. Yu, Q. Liu, J. Y. Liu, R. R. Chen, H. S. Zhang, R. M. Li, J. Yu and J. Wang, *J. Colloid Interf. Sci.*, 2019, **557**, 76-83.
44. J. H. Lin, H. Y. Liang, H. N. Jia, S. L. Chen, Y. F. Cai, J. L. Qi, J. Cao, W. D. Fei and J. C. Feng, *Inorg. Chem. Front.*, 2017, **4**, 1575-1581.
45. K. W. Qiu, M. Lu, Y. S. Luo and X. W. Du, *J. Mater. Chem. A*, 2017, **5**, 5820-5828.
46. Y. Wang, H. L. Wei, H. F. Lv, Z. X. Chen, J. J. Zhang, X. Y. Yan, L. Lee, Z. M. M. Wang and Y. L. Chueh, *ACS Nano*, 2019, **13**, 11235-11248.
47. S. Kandula, K. R. Shrestha, G. Rajeshkhanna, N. H. Kim and J. H. Lee, *ACS Appl. Mater. Interfaces*, 2019, **11**, 11555-11567.
48. S. Chen, S. Cui, S. Chandrasekaran, C. Ke, Z. Li, P. Chen, C. Zhang and Y. Jiang, *Electrochim. Acta*, 2020, **341**, 135893.
49. R. BoopathiRaja, M. Parthibavarman and A. N. Begum, *Mater. Res. Bull.*, 2020, **126**, 110817.
50. X. Xu, Y. Liu, P. Dong, P. M. Ajayan, J. Shen and M. Ye, *J. Power Sources*, 2018, **400**, 96-103.
